# Supplementary material for: Adipocyte-Derived Small Extracellular Vesicles from Patients with Alzheimer Disease Carry miRNAs Predicted to Target the CREB Signaling Pathway in Neurons
Source: MDPI journal article supplement (doi:10.3390/ijms241814024), 2023-09-13
Supplement: s1 [file s1]

**Supplemental Table S2.** Differentially expressed microRNAs between AD and Control from ad-sEVs isolated from serum (Fold Change  $\geq |1.1|$ ; p-value  $< 0.1$ )

| Transcript ID     | Fold-Change(AD vs. Control) | p-Value (AD vs. Control) |
|-------------------|-----------------------------|--------------------------|
| hsa-let-7a-5p     | -1.13177                    | 0.0277742                |
| hsa-let-7c-3p     | 1.13721                     | 0.0812868                |
| hsa-miR-106b-5p   | -1.1333                     | 0.0859059                |
| hsa-miR-10b-3p    | 1.2967                      | 0.0826638                |
| hsa-miR-1199-3p   | 1.22177                     | 0.0043076                |
| hsa-miR-1199-5p   | 1.10667                     | 0.0293895                |
| hsa-miR-1236-3p   | 1.24025                     | 0.0347887                |
| hsa-miR-1237-3p   | 1.13805                     | 0.0815098                |
| hsa-miR-1250-3p   | 1.10404                     | 0.0314444                |
| hsa-miR-1252-3p   | 1.11744                     | 0.022432                 |
| hsa-miR-1255b-5p  | 1.44971                     | 0.0475576                |
| hsa-miR-125b-2-3p | 1.10283                     | 0.0428087                |
| hsa-miR-1286      | 1.12377                     | 0.0317488                |
| hsa-miR-1303      | 1.11739                     | 0.0650393                |
| hsa-miR-1343-3p   | 1.88688                     | 0.0266127                |
| hsa-miR-138-1-3p  | -1.70133                    | 0.095376                 |
| hsa-miR-138-5p    | 1.12729                     | 0.0573332                |
| hsa-miR-139-5p    | 1.15103                     | 0.0338362                |
| hsa-miR-185-5p    | 1.10646                     | 0.0326375                |
| hsa-miR-186-3p    | -1.1369                     | 0.0628287                |
| hsa-miR-187-5p    | -1.24044                    | 0.0205276                |
| hsa-miR-1908-5p   | 1.17038                     | 0.0963102                |
| hsa-miR-190a-5p   | -1.11827                    | 0.087159                 |
| hsa-miR-1913      | 1.24058                     | 0.0488713                |
| hsa-miR-1914-5p   | 1.41906                     | 0.0894655                |
| hsa-miR-196a-5p   | -1.18471                    | 0.0560181                |
| hsa-miR-197-5p    | 1.19797                     | 0.0338943                |
| hsa-miR-200c-5p   | -1.10768                    | 0.0368413                |
| hsa-miR-208a-5p   | -1.13035                    | 0.0977729                |
| hsa-miR-21-5p     | -1.15849                    | 0.000795994              |
| hsa-miR-217       | 2.49834                     | 0.0483326                |
| hsa-miR-224-3p    | 1.10096                     | 0.0694768                |
| hsa-miR-224-5p    | 1.10065                     | 0.07306                  |
| hsa-miR-2276-5p   | 1.10549                     | 0.0794444                |
| hsa-miR-24-2-5p   | -1.29857                    | 0.0256113                |
| hsa-miR-26a-5p    | 1.13122                     | 0.0498957                |

|                   |          |            |
|-------------------|----------|------------|
| hsa-miR-297       | -1.16488 | 0.00473434 |
| hsa-miR-301a-3p   | 1.11862  | 0.0375706  |
| hsa-miR-301b      | -1.10113 | 0.0573039  |
| hsa-miR-302f      | -1.11358 | 0.0651033  |
| hsa-miR-3064-3p   | -1.24351 | 0.0411377  |
| hsa-miR-31-3p     | 1.12535  | 0.0497808  |
| hsa-miR-3117-5p   | 1.11547  | 0.0378873  |
| hsa-miR-3158-5p   | 1.11649  | 0.0340265  |
| hsa-miR-3160-3p   | 1.33344  | 0.00741704 |
| hsa-miR-3166      | 1.14363  | 0.012546   |
| hsa-miR-3175      | 1.22684  | 0.0039855  |
| hsa-miR-3177-5p   | 1.13193  | 0.0279692  |
| hsa-miR-3188      | -1.1435  | 0.0302046  |
| hsa-miR-323a-5p   | 1.1365   | 0.0618984  |
| hsa-miR-33a-3p    | -1.11106 | 0.0898195  |
| hsa-miR-3605-3p   | -1.11726 | 0.0731036  |
| hsa-miR-3605-5p   | 1.18348  | 0.0744513  |
| hsa-miR-3607-5p   | -1.11851 | 0.0200367  |
| hsa-miR-3612      | -1.10526 | 0.00594083 |
| hsa-miR-3620-5p   | -1.22408 | 0.0941493  |
| hsa-miR-3622b-3p  | -1.10656 | 0.00389375 |
| hsa-miR-3655      | -1.27514 | 0.00768299 |
| hsa-miR-3678-5p   | 1.37184  | 0.0146815  |
| hsa-miR-3679-3p   | 1.62929  | 0.00538746 |
| hsa-miR-3692-3p   | 1.15509  | 0.0266596  |
| hsa-miR-374b-3p   | -1.10538 | 0.06478    |
| hsa-miR-376a-2-5p | -1.11308 | 0.024737   |
| hsa-miR-3915      | 1.26589  | 0.0621354  |
| hsa-miR-3921      | 1.52714  | 0.0717592  |
| hsa-miR-3926      | 1.29811  | 0.0700366  |
| hsa-miR-3943      | 1.32304  | 0.0139314  |
| hsa-miR-3944-3p   | 1.11612  | 0.0938358  |
| hsa-miR-3944-5p   | 1.15203  | 0.0283838  |
| hsa-miR-409-5p    | -1.2437  | 0.00159462 |
| hsa-miR-4259      | -1.20347 | 0.00386513 |
| hsa-miR-4273      | -1.19161 | 0.00845012 |
| hsa-miR-4279      | 1.11875  | 0.029903   |
| hsa-miR-429       | -1.17203 | 0.0952935  |
| hsa-miR-4294      | 1.16799  | 0.00220369 |
| hsa-miR-4306      | -1.13151 | 0.0483574  |

|                  |          |             |
|------------------|----------|-------------|
| hsa-miR-4329     | 1.1205   | 0.0783501   |
| hsa-miR-4419a    | -1.19907 | 0.00477339  |
| hsa-miR-4421     | -1.14277 | 0.0657246   |
| hsa-miR-4422     | 2.53444  | 0.0477607   |
| hsa-miR-4424     | 1.2313   | 0.00102055  |
| hsa-miR-4446-5p  | 1.20764  | 0.00599809  |
| hsa-miR-4450     | 1.11036  | 0.0911047   |
| hsa-miR-4459     | 1.13035  | 0.0963205   |
| hsa-miR-4464     | -1.10148 | 0.0776449   |
| hsa-miR-4471     | 1.10779  | 0.0877703   |
| hsa-miR-4482-5p  | 1.12715  | 0.0707577   |
| hsa-miR-4505     | -1.17037 | 0.0282409   |
| hsa-miR-451b     | 1.10779  | 0.0787897   |
| hsa-miR-4524b-5p | -1.19024 | 0.000287977 |
| hsa-miR-4528     | -1.13825 | 0.0155555   |
| hsa-miR-4529-3p  | 1.21225  | 0.020685    |
| hsa-miR-4530     | -1.1546  | 0.0383548   |
| hsa-miR-4538     | -1.12579 | 0.0275112   |
| hsa-miR-455-3p   | -1.5558  | 0.0254584   |
| hsa-miR-4643     | 1.15976  | 0.0389565   |
| hsa-miR-4666a-5p | 1.20238  | 0.0574589   |
| hsa-miR-4670-5p  | 1.13946  | 0.0448325   |
| hsa-miR-4705     | 1.1031   | 0.0571685   |
| hsa-miR-4716-5p  | 1.35962  | 0.0528678   |
| hsa-miR-4723-3p  | 1.30219  | 0.0916889   |
| hsa-miR-4725-3p  | 1.1259   | 0.0980072   |
| hsa-miR-4731-5p  | 1.10242  | 0.01535     |
| hsa-miR-4733-3p  | -1.12511 | 0.0948208   |
| hsa-miR-4734     | -1.14392 | 0.0269979   |
| hsa-miR-4735-3p  | 1.13758  | 0.0205188   |
| hsa-miR-4742-5p  | -1.20726 | 0.0713683   |
| hsa-miR-4743-3p  | 1.12787  | 0.032405    |
| hsa-miR-4747-3p  | 1.13943  | 0.0190976   |
| hsa-miR-4749-3p  | 1.44526  | 0.0798796   |
| hsa-miR-4753-5p  | 1.29308  | 0.0215797   |
| hsa-miR-4756-5p  | 2.01263  | 0.0856924   |
| hsa-miR-4763-5p  | 1.13363  | 0.0511754   |
| hsa-miR-4767     | 1.14421  | 0.00608644  |
| hsa-miR-4768-3p  | -1.13528 | 0.0220058   |
| hsa-miR-4773     | 1.17105  | 0.0354102   |
| hsa-miR-487a-5p  | -1.13877 | 0.0253692   |

|                  |          |             |
|------------------|----------|-------------|
| hsa-miR-488-3p   | -1.14613 | 0.0324509   |
| hsa-miR-497-5p   | 1.14022  | 0.0667661   |
| hsa-miR-5004-3p  | 1.10906  | 0.0290855   |
| hsa-miR-5008-3p  | 1.18026  | 0.0312064   |
| hsa-miR-5009-5p  | 1.13581  | 0.0830887   |
| hsa-miR-5047     | 1.10249  | 0.0891322   |
| hsa-miR-505-3p   | -1.11684 | 0.0835975   |
| hsa-miR-5096     | 1.10076  | 0.0358596   |
| hsa-miR-512-3p   | -1.10807 | 0.0749698   |
| hsa-miR-516b-5p  | 1.14368  | 0.0186076   |
| hsa-miR-5187-3p  | 1.10482  | 0.0811398   |
| hsa-miR-5197-5p  | -1.20511 | 0.0827939   |
| hsa-miR-519d-5p  | -1.13717 | 0.0862293   |
| hsa-miR-545-3p   | 1.12151  | 0.0350689   |
| hsa-miR-548av-3p | 1.26309  | 0.00348708  |
| hsa-miR-548k     | -1.16243 | 0.0050528   |
| hsa-miR-548v     | -1.15262 | 0.00815877  |
| hsa-miR-5572     | -1.25752 | 0.00260632  |
| hsa-miR-5581-3p  | 1.16398  | 0.0275883   |
| hsa-miR-5581-5p  | -1.11488 | 0.0730323   |
| hsa-miR-564      | 1.11734  | 0.0192397   |
| hsa-miR-5707     | -1.12952 | 0.0144714   |
| hsa-miR-579-3p   | -1.12952 | 0.087975    |
| hsa-miR-591      | 1.10255  | 0.0318109   |
| hsa-miR-601      | 1.16821  | 0.0254619   |
| hsa-miR-603      | -1.27833 | 0.0440589   |
| hsa-miR-6069     | 1.54165  | 0.000552017 |
| hsa-miR-6085     | 1.37303  | 0.0422034   |
| hsa-miR-6087     | 1.58062  | 0.079137    |
| hsa-miR-6089     | 1.96894  | 0.0952743   |
| hsa-miR-6129     | -1.12131 | 0.0908769   |
| hsa-miR-621      | 1.13556  | 0.036581    |
| hsa-miR-622      | -1.12012 | 0.0756841   |
| hsa-miR-624-3p   | 1.10669  | 0.00659693  |
| hsa-miR-654-5p   | 1.14644  | 0.0708922   |
| hsa-miR-660-5p   | -1.10486 | 0.0364328   |
| hsa-miR-670-5p   | -1.12571 | 0.0256287   |
| hsa-miR-6716-3p  | 1.42473  | 0.00359851  |
| hsa-miR-6760-3p  | 1.47814  | 0.0243843   |
| hsa-miR-6761-5p  | -1.10375 | 0.0767089   |
| hsa-miR-6770-5p  | 1.12869  | 0.0736925   |

|                 |          |            |
|-----------------|----------|------------|
| hsa-miR-6786-3p | 1.29276  | 0.0110051  |
| hsa-miR-6787-3p | -1.11356 | 0.0775895  |
| hsa-miR-6793-3p | 1.23888  | 0.0820825  |
| hsa-miR-6793-5p | 1.14179  | 0.014394   |
| hsa-miR-6798-3p | 1.41431  | 0.0475633  |
| hsa-miR-6812-3p | 1.3314   | 0.0130667  |
| hsa-miR-6817-3p | -1.15096 | 0.0727983  |
| hsa-miR-6819-5p | 1.18943  | 0.0600201  |
| hsa-miR-6823-5p | 1.10534  | 0.0809655  |
| hsa-miR-6824-3p | 1.17036  | 0.0384258  |
| hsa-miR-6825-5p | 1.14079  | 0.0724082  |
| hsa-miR-6829-3p | -1.17579 | 0.0234138  |
| hsa-miR-6837-3p | 1.35107  | 0.0131251  |
| hsa-miR-6838-5p | 1.13749  | 0.0909215  |
| hsa-miR-6842-5p | 1.14788  | 0.00748683 |
| hsa-miR-6846-3p | 1.16616  | 0.0679891  |
| hsa-miR-6846-5p | -1.15192 | 0.0477337  |
| hsa-miR-6865-3p | -1.1136  | 0.0657678  |
| hsa-miR-6868-5p | 1.16826  | 0.075809   |
| hsa-miR-6869-3p | 1.1009   | 0.0239604  |
| hsa-miR-6875-3p | 1.13177  | 0.0325637  |
| hsa-miR-6890-3p | 1.22677  | 0.0542669  |
| hsa-miR-7113-3p | 1.99159  | 0.00621289 |
| hsa-miR-767-3p  | 1.3135   | 0.0120529  |
| hsa-miR-7706    | 1.11321  | 0.047162   |
| hsa-miR-8083    | -1.11311 | 0.0170642  |
| hsa-miR-874-5p  | 1.18564  | 0.0716315  |
| hsa-miR-888-5p  | 1.7567   | 0.0167286  |
| hsa-miR-891a-3p | -1.12629 | 0.0541082  |
| hsa-miR-93-5p   | 1.33629  | 0.0262484  |
| hsa-miR-95-5p   | 1.16344  | 0.0267385  |
