# Supplementary material for: Adipocyte-Derived Small Extracellular Vesicles from Patients with Alzheimer Disease Carry miRNAs Predicted to Target the CREB Signaling Pathway in Neurons
Source: MDPI journal article supplement (doi:10.3390/ijms241814024), 2023-09-13
Supplement: s1 [file s1]

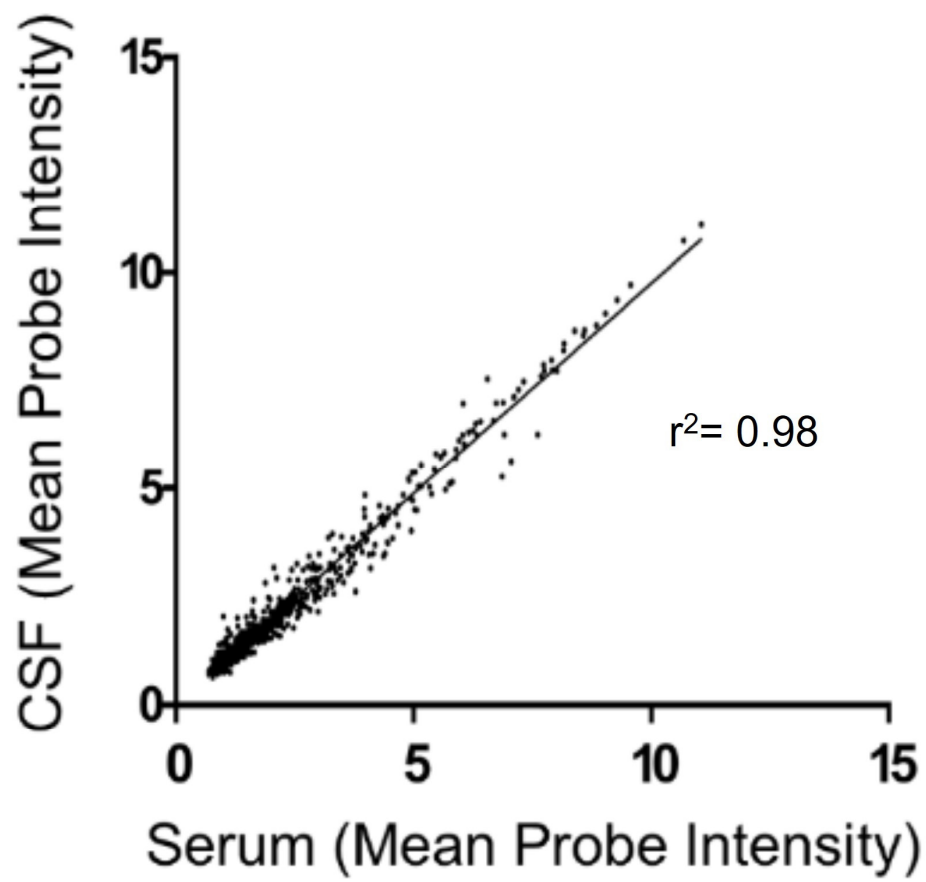

**Figure S1:** The linear regression of the mean probe intensities for all matched serum and CSF samples.

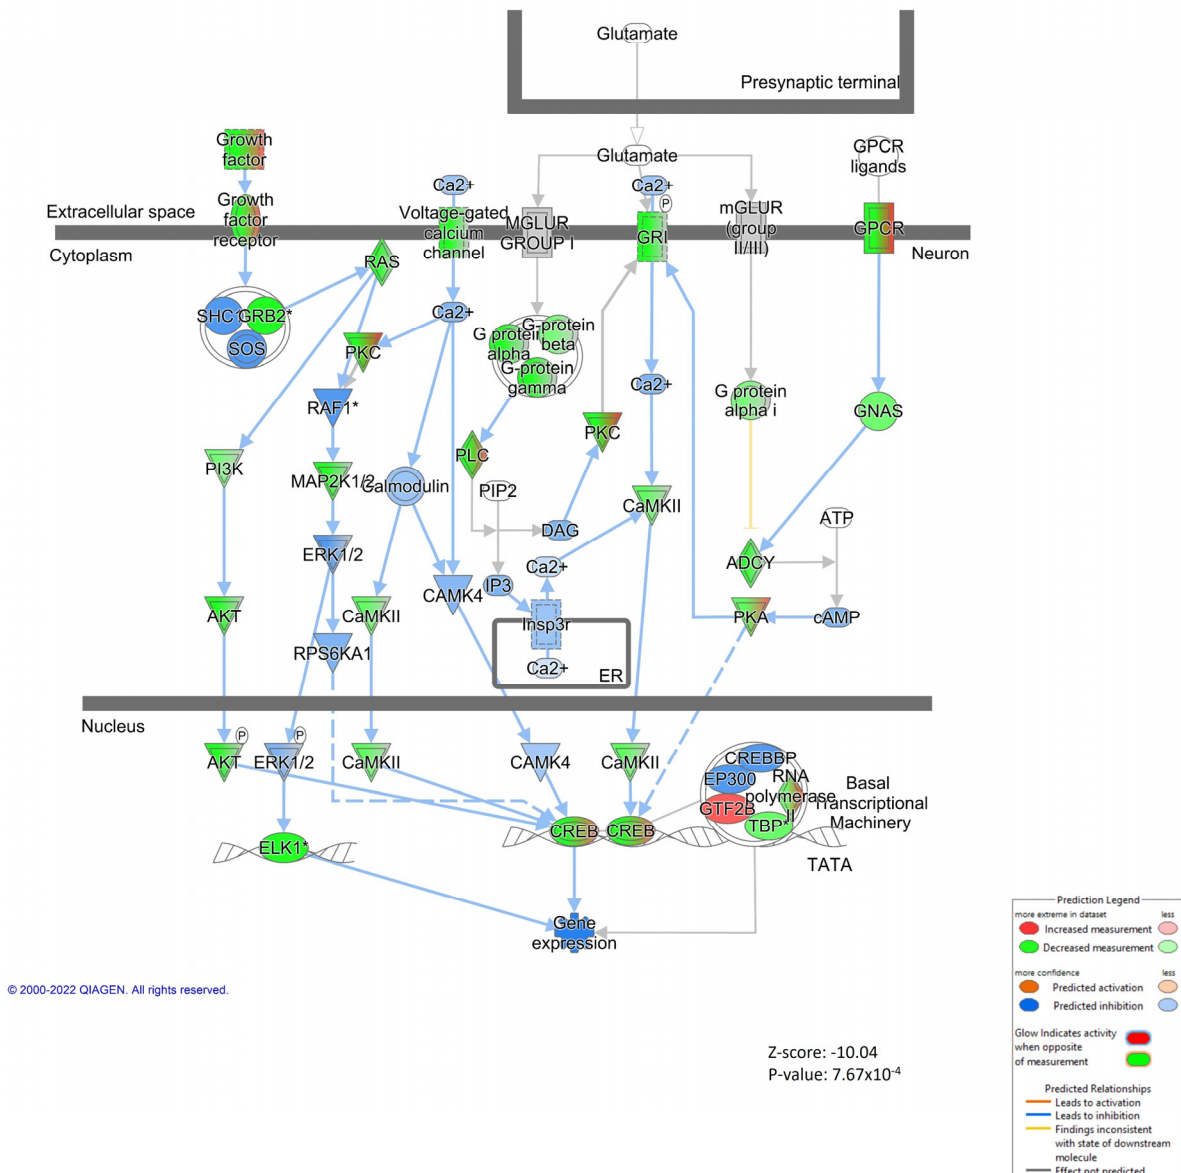

**Figure S2.** The predicted CREB signaling in neurons pathway based on differentially expressed miRNAs in the serum of AD patients vs. controls.

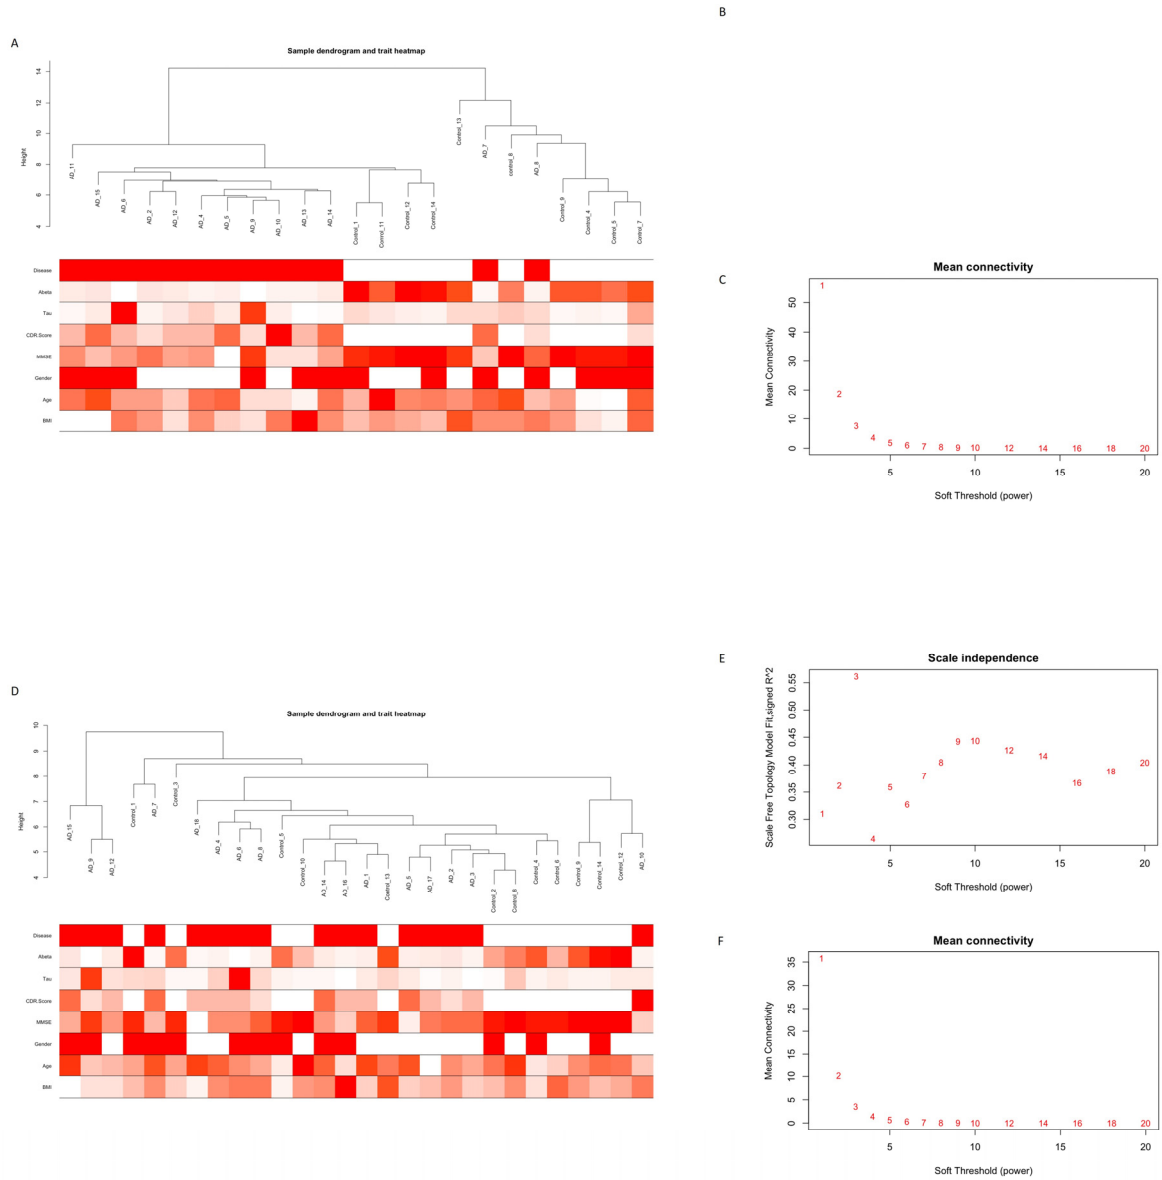

**Figure S3.** Sample dendrogram and trait heatmap for the (A) CSF and (D) serum. White indicates a low value, and red indicates a high value. (B) The scale-free fit index (y-axis) as a function of the soft-thresholding power (x-axis) for CSF. (C) The mean connectivity (degree, y-axis) as a function of the soft thresholding power in the CSF. (E) The scale-free fit index (y-axis) as a function of the soft-thresholding power (x-axis) for serum. (F) The mean connectivity (degree, y-axis) as a function of the soft thresholding power in the serum.
