# Supplementary material for: Adipocyte-Derived Small Extracellular Vesicles from Patients with Alzheimer Disease Carry miRNAs Predicted to Target the CREB Signaling Pathway in Neurons
Source: MDPI journal article supplement (doi:10.3390/ijms241814024), 2023-09-13
Supplement: s1 [file s1]

**Supplemental Table S1.** Differentially expressed microRNAs between AD and Control from ad-sEVs isolated from CSF (Fold Change  $\geq |1.1|$ ; p- value < 0.1)

| Transcript ID   | Fold-Change<br>(AD vs. Control ) | p-value<br>(AD vs. Control ) |
|-----------------|----------------------------------|------------------------------|
| hsa-let-7f-5p   | 1.10149                          | 0.0797757                    |
| hsa-miR-1185-5p | -1.12083                         | 0.0897443                    |
| hsa-miR-1193    | 1.15728                          | 0.00823808                   |
| hsa-miR-1200    | -1.12264                         | 0.0225944                    |
| hsa-miR-1202    | 1.23292                          | 0.072288                     |
| hsa-miR-1204    | 1.13378                          | 0.0249948                    |
| hsa-miR-1207-3p | 1.23497                          | 0.0117734                    |
| hsa-miR-1207-5p | 1.42981                          | 0.08967                      |
| hsa-miR-1225-3p | 1.32327                          | 0.0926715                    |
| hsa-miR-1227-3p | 1.25447                          | 0.00923388                   |
| hsa-miR-1233-5p | 1.14433                          | 0.0798651                    |
| hsa-miR-1236-5p | 1.71123                          | 0.0744683                    |
| hsa-miR-1246    | 1.15991                          | 0.0295699                    |
| hsa-miR-1249    | 1.60308                          | 0.0332896                    |
| hsa-miR-1269b   | 1.20802                          | 0.0118193                    |
| hsa-miR-1271-5p | -1.11083                         | 0.0717676                    |
| hsa-miR-1276    | 1.1063                           | 0.0303951                    |
| hsa-miR-1277-5p | 1.12356                          | 0.0837516                    |
| hsa-miR-1278    | 1.14174                          | 0.0954964                    |
| hsa-miR-1284    | 1.12457                          | 0.0250539                    |
| hsa-miR-1286    | -1.18097                         | 0.00172318                   |
| hsa-miR-1289    | 1.16315                          | 0.000216639                  |
| hsa-miR-1298-5p | 1.12638                          | 0.0529002                    |
| hsa-miR-1303    | -1.11798                         | 0.0715363                    |
| hsa-miR-1304-5p | 1.14404                          | 0.0938439                    |
| hsa-miR-130b-5p | 1.10828                          | 0.0908011                    |
| hsa-miR-134-5p  | -1.15121                         | 0.0534252                    |
| hsa-miR-140-3p  | 1.19881                          | 0.00563168                   |
| hsa-miR-15a-3p  | 1.12117                          | 0.0957291                    |
| hsa-miR-183-3p  | -1.18998                         | 0.0162964                    |
| hsa-miR-188-5p  | 1.13787                          | 0.0840471                    |
| hsa-miR-1911-5p | 1.12781                          | 0.0704566                    |
| hsa-miR-1915-5p | 1.16272                          | 0.0336596                    |
| hsa-miR-192-3p  | 1.14103                          | 0.023333                     |
| hsa-miR-193a-5p | -1.12474                         | 0.0353834                    |
| hsa-miR-196b-3p | -2.75798                         | 0.0781355                    |

|                  |          |             |
|------------------|----------|-------------|
| hsa-miR-199a-3p  | 1.12907  | 0.0199701   |
| hsa-miR-199b-3p  | 1.12907  | 0.0199701   |
| hsa-miR-203b-3p  | 2.05362  | 0.0864085   |
| hsa-miR-205-3p   | 1.17175  | 0.000930386 |
| hsa-miR-2114-3p  | -1.1028  | 0.0664786   |
| hsa-miR-218-5p   | -1.10061 | 0.0978838   |
| hsa-miR-219a-5p  | 1.11118  | 0.0518213   |
| hsa-miR-22-3p    | -1.13699 | 0.032123    |
| hsa-miR-2277-3p  | -1.10647 | 0.0481512   |
| hsa-miR-2278     | 1.32753  | 0.07255     |
| hsa-miR-24-2-5p  | -1.16259 | 0.0718464   |
| hsa-miR-25-3p    | 1.15063  | 0.0970387   |
| hsa-miR-2681-3p  | 1.13532  | 0.00736711  |
| hsa-miR-2682-3p  | -1.15513 | 0.00762352  |
| hsa-miR-2909     | -1.13451 | 0.0141313   |
| hsa-miR-299-5p   | 1.15752  | 0.0500452   |
| hsa-miR-302d-5p  | -1.10723 | 0.0405406   |
| hsa-miR-3115     | -1.10419 | 0.0246518   |
| hsa-miR-3117-5p  | -1.12834 | 0.0636762   |
| hsa-miR-3138     | -1.11411 | 0.0868009   |
| hsa-miR-3150b-5p | 1.18217  | 0.0743547   |
| hsa-miR-3151-3p  | 1.19086  | 0.0240769   |
| hsa-miR-3154     | 1.12643  | 0.0767281   |
| hsa-miR-3156-5p  | 1.16621  | 0.0211226   |
| hsa-miR-3160-5p  | -1.13809 | 0.0390836   |
| hsa-miR-3161     | -1.14894 | 0.0445998   |
| hsa-miR-3164     | 1.49017  | 0.0806687   |
| hsa-miR-3180-5p  | 1.21579  | 0.0872178   |
| hsa-miR-3200-3p  | -1.12268 | 0.0187395   |
| hsa-miR-3200-5p  | -1.11283 | 0.0744283   |
| hsa-miR-3201     | 1.3472   | 0.0931715   |
| hsa-miR-323a-3p  | 1.12239  | 0.0772629   |
| hsa-miR-337-3p   | -1.27636 | 0.0286771   |
| hsa-miR-3610     | -1.13102 | 0.0531739   |
| hsa-miR-3616-3p  | 1.13125  | 0.0858092   |
| hsa-miR-3652     | 1.16674  | 0.0751219   |
| hsa-miR-3664-3p  | -1.18027 | 0.0827643   |
| hsa-miR-3666     | -1.39092 | 0.0109364   |
| hsa-miR-3677-5p  | -1.12014 | 0.0637666   |
| hsa-miR-3679-5p  | 2.88778  | 0.00284932  |
| hsa-miR-3684     | -1.11747 | 0.0171116   |

|                  |          |            |
|------------------|----------|------------|
| hsa-miR-3689d    | 1.10963  | 0.0535744  |
| hsa-miR-373-5p   | -1.17872 | 0.0372202  |
| hsa-miR-374b-3p  | 1.1168   | 0.0663256  |
| hsa-miR-376a-3p  | 1.84066  | 0.00411828 |
| hsa-miR-378a-3p  | -1.13621 | 0.0293736  |
| hsa-miR-380-5p   | -1.13177 | 0.0316654  |
| hsa-miR-3911     | -1.22416 | 0.0330252  |
| hsa-miR-3915     | 1.24666  | 0.0626638  |
| hsa-miR-3918     | 1.13819  | 0.0796406  |
| hsa-miR-3925-3p  | 1.10264  | 0.0158238  |
| hsa-miR-3945     | -1.13028 | 0.0887894  |
| hsa-miR-3977     | -1.17009 | 0.00448556 |
| hsa-miR-409-3p   | 1.2816   | 0.0340593  |
| hsa-miR-425-5p   | 1.12258  | 0.0526108  |
| hsa-miR-4263     | -1.16337 | 0.0376118  |
| hsa-miR-4274     | 1.51581  | 0.00799523 |
| hsa-miR-4275     | 1.12375  | 0.0592624  |
| hsa-miR-4281     | 1.51877  | 0.0464617  |
| hsa-miR-4297     | 1.11897  | 0.0822888  |
| hsa-miR-4310     | 1.60319  | 0.0364734  |
| hsa-miR-4314     | 1.67514  | 0.0902983  |
| hsa-miR-433-5p   | -1.12193 | 0.0263853  |
| hsa-miR-4426     | -1.16037 | 0.00381748 |
| hsa-miR-4432     | -1.56716 | 0.082786   |
| hsa-miR-4439     | 1.11183  | 0.0480312  |
| hsa-miR-4482-3p  | -1.11871 | 0.0698481  |
| hsa-miR-4488     | -1.14924 | 0.0436392  |
| hsa-miR-4490     | -1.24662 | 0.00348656 |
| hsa-miR-4492     | 1.13125  | 0.0773364  |
| hsa-miR-4497     | -1.1841  | 0.0691412  |
| hsa-miR-4503     | 1.18233  | 0.0420616  |
| hsa-miR-4504     | 1.11327  | 0.0455249  |
| hsa-miR-4505     | 1.22576  | 0.0285877  |
| hsa-miR-4514     | 1.46082  | 0.0941025  |
| hsa-miR-4524a-3p | 1.18912  | 0.0530895  |
| hsa-miR-4532     | -1.16488 | 0.0666016  |
| hsa-miR-4539     | -1.14262 | 0.0772943  |
| hsa-miR-4634     | -1.19727 | 0.00183033 |
| hsa-miR-4640-5p  | 1.21051  | 0.0276935  |
| hsa-miR-4642     | 1.34714  | 0.0506389  |
| hsa-miR-4646-3p  | 1.14489  | 0.095003   |

|                  |          |             |
|------------------|----------|-------------|
| hsa-miR-4652-3p  | 1.20316  | 0.053275    |
| hsa-miR-4659a-3p | 1.10176  | 0.0066628   |
| hsa-miR-4661-3p  | -1.12973 | 0.0544202   |
| hsa-miR-4662a-3p | -1.15278 | 0.0961803   |
| hsa-miR-4666a-5p | -1.29652 | 0.0521443   |
| hsa-miR-4670-5p  | -1.11424 | 0.048036    |
| hsa-miR-4685-5p  | 1.12838  | 0.081669    |
| hsa-miR-4705     | 1.13906  | 0.012456    |
| hsa-miR-4707-3p  | 1.35241  | 0.0101257   |
| hsa-miR-4712-5p  | 1.11696  | 0.0570727   |
| hsa-miR-4714-3p  | -1.19155 | 0.0259763   |
| hsa-miR-4716-3p  | 1.82986  | 0.0609547   |
| hsa-miR-4721     | -1.13772 | 0.0488907   |
| hsa-miR-4725-3p  | 1.18328  | 0.0333919   |
| hsa-miR-4735-3p  | 1.17601  | 0.0234188   |
| hsa-miR-4739     | 1.22884  | 0.0151969   |
| hsa-miR-4740-5p  | 1.10451  | 0.027732    |
| hsa-miR-4745-3p  | 1.13297  | 0.00877104  |
| hsa-miR-4747-5p  | -1.12899 | 0.0671991   |
| hsa-miR-4750-3p  | 1.43774  | 0.0742748   |
| hsa-miR-4750-5p  | 1.17524  | 0.0557961   |
| hsa-miR-4769-3p  | 1.46911  | 0.0282526   |
| hsa-miR-4769-5p  | 1.15076  | 0.0825036   |
| hsa-miR-4774-3p  | 1.1526   | 0.096135    |
| hsa-miR-4779     | 1.82312  | 0.0435946   |
| hsa-miR-4792     | 1.15468  | 0.0345627   |
| hsa-miR-4799-3p  | -1.10651 | 0.0897789   |
| hsa-miR-483-5p   | 2.20327  | 0.000788546 |
| hsa-miR-496      | -1.1327  | 0.0215909   |
| hsa-miR-497-3p   | 1.12347  | 0.0341588   |
| hsa-miR-497-5p   | 1.11031  | 0.074853    |
| hsa-miR-499a-3p  | 1.12465  | 0.0717019   |
| hsa-miR-5002-5p  | 1.11683  | 0.0246336   |
| hsa-miR-500b-5p  | -1.14168 | 0.0736747   |
| hsa-miR-501-3p   | -1.17764 | 0.0292446   |
| hsa-miR-5010-5p  | 1.28731  | 0.0564004   |
| hsa-miR-503-5p   | 1.17773  | 0.0327721   |
| hsa-miR-509-5p   | -1.12082 | 0.0688064   |
| hsa-miR-514a-5p  | 1.12093  | 0.0351929   |
| hsa-miR-517-5p   | -1.1584  | 0.0372689   |
| hsa-miR-518a-5p  | -1.12217 | 0.0757206   |

|                  |          |            |
|------------------|----------|------------|
| hsa-miR-5195-5p  | 1.23232  | 0.0581709  |
| hsa-miR-520f-5p  | 1.12902  | 0.0107023  |
| hsa-miR-524-5p   | 1.36801  | 0.0399535  |
| hsa-miR-526b-5p  | 1.22401  | 0.0350348  |
| hsa-miR-527      | -1.12217 | 0.0757206  |
| hsa-miR-548ab    | 1.10737  | 0.0300979  |
| hsa-miR-548ah-5p | -1.15061 | 0.00639149 |
| hsa-miR-548w     | 1.18628  | 0.0041055  |
| hsa-miR-5580-3p  | -1.13095 | 0.0801792  |
| hsa-miR-5583-3p  | 1.11909  | 0.0506909  |
| hsa-miR-5585-3p  | 1.14297  | 0.0729767  |
| hsa-miR-5587-3p  | 1.10895  | 0.0809632  |
| hsa-miR-5589-5p  | 1.1418   | 0.0813504  |
| hsa-miR-5591-5p  | 1.11351  | 0.084305   |
| hsa-miR-5700     | -1.13389 | 0.0461513  |
| hsa-miR-576-3p   | 1.91035  | 0.00682479 |
| hsa-miR-604      | -1.27363 | 0.0397478  |
| hsa-miR-605-3p   | -1.13923 | 0.0737419  |
| hsa-miR-6083     | -1.12105 | 0.0815203  |
| hsa-miR-613      | -1.11805 | 0.0346498  |
| hsa-miR-6131     | 1.19858  | 0.0240259  |
| hsa-miR-625-3p   | 1.51464  | 0.0145551  |
| hsa-miR-625-5p   | 1.89289  | 0.0761664  |
| hsa-miR-627-3p   | -15.4881 | 0.0450433  |
| hsa-miR-630      | 1.14003  | 0.0143177  |
| hsa-miR-636      | 3.26459  | 0.0578967  |
| hsa-miR-637      | -1.46533 | 0.0167417  |
| hsa-miR-642a-3p  | 1.86326  | 0.00148693 |
| hsa-miR-6500-5p  | 1.1519   | 0.0254942  |
| hsa-miR-6501-5p  | -1.1716  | 0.0378687  |
| hsa-miR-6506-5p  | 1.19239  | 0.0226866  |
| hsa-miR-6513-5p  | 1.12792  | 0.0657771  |
| hsa-miR-658      | 1.20795  | 0.0604973  |
| hsa-miR-659-3p   | 1.28872  | 0.0177836  |
| hsa-miR-664a-5p  | 1.90853  | 0.0222939  |
| hsa-miR-668-3p   | 1.26753  | 0.0464705  |
| hsa-miR-6722-3p  | -1.20034 | 0.0322632  |
| hsa-miR-6732-5p  | 1.48018  | 0.0437548  |
| hsa-miR-6741-5p  | -1.16261 | 0.0840121  |
| hsa-miR-6747-3p  | -1.81023 | 0.0921802  |
| hsa-miR-6747-5p  | 1.2461   | 0.0119783  |

|                 |          |             |
|-----------------|----------|-------------|
| hsa-miR-675-3p  | -1.21038 | 0.0346676   |
| hsa-miR-675-5p  | -1.14107 | 0.0456228   |
| hsa-miR-6753-3p | -1.14818 | 0.0284435   |
| hsa-miR-6757-3p | 1.16511  | 0.037885    |
| hsa-miR-6760-3p | 1.61699  | 0.0462611   |
| hsa-miR-6768-5p | 1.35191  | 0.0273011   |
| hsa-miR-6775-5p | 1.81621  | 0.0140146   |
| hsa-miR-6776-5p | 1.16279  | 0.0972545   |
| hsa-miR-6783-5p | 1.68876  | 0.0550799   |
| hsa-miR-6788-5p | 1.13592  | 0.0918777   |
| hsa-miR-6796-3p | 1.3544   | 0.0594585   |
| hsa-miR-6797-3p | 1.34465  | 0.0386018   |
| hsa-miR-6797-5p | 1.65365  | 0.014762    |
| hsa-miR-6798-3p | 1.83546  | 0.011291    |
| hsa-miR-6805-3p | 1.42038  | 0.0135338   |
| hsa-miR-6807-3p | 1.12518  | 0.0830775   |
| hsa-miR-6814-5p | -1.16906 | 0.00564461  |
| hsa-miR-6815-3p | 1.11802  | 0.0178991   |
| hsa-miR-6818-5p | 1.14035  | 0.0631906   |
| hsa-miR-6829-5p | -1.17    | 0.0779249   |
| hsa-miR-6834-5p | -1.11906 | 0.0686274   |
| hsa-miR-6836-3p | 1.44506  | 0.0138726   |
| hsa-miR-6840-5p | 1.20196  | 0.0956448   |
| hsa-miR-6847-3p | 1.17069  | 0.071335    |
| hsa-miR-6854-3p | 1.14838  | 0.0141964   |
| hsa-miR-6855-5p | 1.19263  | 0.0328708   |
| hsa-miR-6856-3p | 1.10527  | 0.0575459   |
| hsa-miR-6858-3p | 1.34247  | 0.0620538   |
| hsa-miR-6861-5p | 1.13272  | 0.0793974   |
| hsa-miR-6863    | 1.12129  | 0.0215275   |
| hsa-miR-6870-5p | 1.28963  | 0.0288787   |
| hsa-miR-6874-3p | -1.30291 | 0.0414019   |
| hsa-miR-6886-3p | -1.3017  | 0.0292102   |
| hsa-miR-6888-5p | -1.11059 | 0.0865319   |
| hsa-miR-7111-5p | -1.17043 | 0.0649289   |
| hsa-miR-7150    | 1.19642  | 0.0841284   |
| hsa-miR-7152-3p | -1.11317 | 0.0416619   |
| hsa-miR-7153-3p | -1.10096 | 0.0484984   |
| hsa-miR-7156-3p | 1.37145  | 0.000988049 |
| hsa-miR-7157-5p | 1.11079  | 0.0765129   |
| hsa-miR-7158-3p | 1.12214  | 0.0508187   |

|                 |          |           |
|-----------------|----------|-----------|
| hsa-miR-7160-3p | 1.1772   | 0.0666053 |
| hsa-miR-7162-3p | 1.15097  | 0.0139879 |
| hsa-miR-7515    | 1.32434  | 0.0538987 |
| hsa-miR-766-3p  | 1.21472  | 0.0164327 |
| hsa-miR-766-5p  | -1.29776 | 0.0177525 |
| hsa-miR-7855-5p | 1.22003  | 0.0329069 |
| hsa-miR-8059    | 1.32572  | 0.0662445 |
| hsa-miR-8087    | 1.13113  | 0.0571774 |
| hsa-miR-924     | -1.23754 | 0.0569147 |
| hsa-miR-95-5p   | -1.10425 | 0.0209264 |
